# Supplementary material
Source: PubMed Central journal article supplement (PMC9971882)
Supplement: mmc1.pdf [file mmc1.pdf]

## **Supplemental information**

### **Delta-Omicron recombinant escapes**

#### **therapeutic antibody neutralization**

**Ralf Duerr, Hao Zhou, Takuya Tada, Dacia Dimartino, Christian Marier, Paul Zappile, Guiqing Wang, Jonathan Plitnick, Sara B. Griesemer, Roxanne Girardin, Jessica Machowski, Sean Bialosuknia, Erica Lasek-Nesselquist, Samuel L. Hong, Guy Baele, Meike Dittmann, Mila B. Ortigoza, Prithiv J. Prasad, Kathleen McDonough, Nathaniel R. Landau, Kirsten St George, and Adriana Heguy**

## Supplemental Information

### **This PDF file includes:**

Figures S1 to S2  
Tables S1 to S4

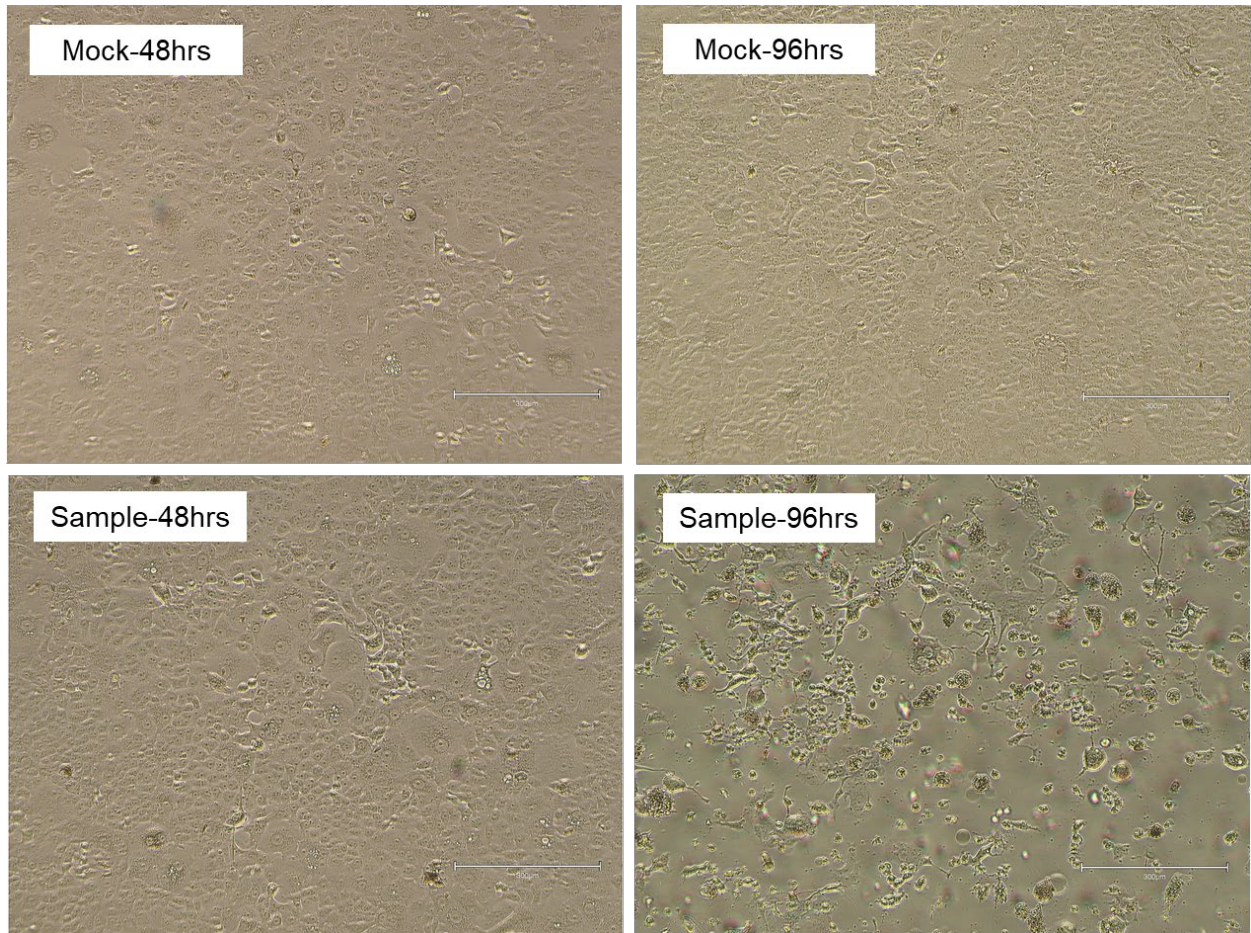

**Figure S1.** Cytopathic effect of the SARS-CoV-2 Delta-Omicron recombinant on VeroE6/TMPRSS2 cells, related to **Figure 1**.

A residual nasopharyngeal swab specimen of the patient infected with the recombinant variant was inoculated onto VeroE6/TMPRSS2 cells and observed daily for cytopathic effects (bottom row). The image on the lower right (Sample-96hrs) is the same as the left image in **Figure 1D** (Delta-Omicron recombinant). Images were taken with an EVOS M5000 inverted microscope (ThermoFisher Scientific, Waltham, MA); 10X magnification.

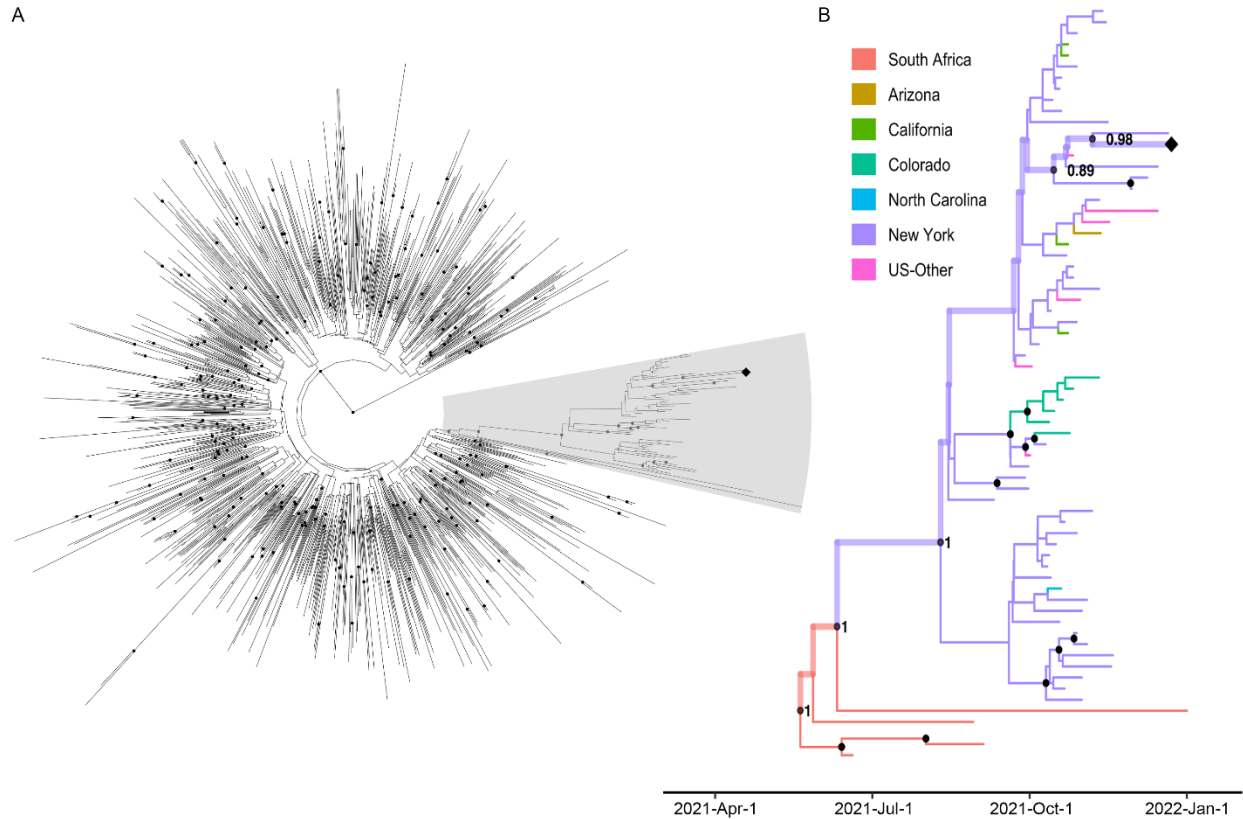

**Figure S2.** Phylogeographic analysis of the AY.45 cluster containing the recombinant, related to **Figure 1**.

**(A)** Maximum clade credibility tree of 1122 AY.45 genomes. The recombinant genome (AY.45 segment of it) is highlighted with a diamond symbol. Nodes with a posterior support above 70% are denoted with a black circle. A well supported phylogenetic cluster containing the recombinant genome is shaded in gray.

**(B)** Phylogeographic analysis of the phylogenetic cluster containing the AY.45 segment of the recombinant sequence. The recombinant is annotated with a diamond symbol, and branches corresponding to the Markov jump trajectory plot (**Figure 1C**) are highlighted (by thicker branches). Internal nodes with posterior support of 70% or higher are denoted with a black circle, whereas nodes with 100% support are annotated explicitly.

**Table S1.** Summary of mutations detected in the Delta-Omicron recombinant by four sequencing methods on different sample aliquots, with or without in vitro culture, related to **Figure 1**.

| gene   | nucleotide       | amino acid           | donor   | xGen | xGen<br>(repeat) | shotgun | AmpliSeq | harvest        | 24h | 48h | 72h            | 96h            |
|--------|------------------|----------------------|---------|------|------------------|---------|----------|----------------|-----|-----|----------------|----------------|
| ORF1ab | C1122T           | P106L                | Delta   | X    | X                | X       | X        | X              | X   | X   | X              | X              |
| ORF1ab | G4181T           | A488S                | Delta   | X    | X                | X       | X        | X              | X   | X   | X              | X              |
| ORF1ab | C5526T           | T936I                | Delta   | X    | X                | X       | X        | X              | X   | X   | X              | X              |
| ORF1ab | C6402T           | P1228L               | Delta   | X    | X                | X       | X        | X              | X   | X   | X              | X              |
| ORF1ab | C7124T           | P1469S               | Delta   | X    | X                | X       | X        | X              | X   | X   | X              | X              |
| ORF1ab | G9053T           | V167L                | Delta   | X    | X                | X       | X        | X              | X   | X   | X              | X              |
| ORF1ab | G9335A           | V261I                | Delta   | X    | X                | X       | X        | X              | X   | X   | X              | X              |
| ORF1ab | C10029T          | T492I                | Delta   | X    | X                | X       | X        | X              | X   | X   | X              | X              |
| ORF1ab | C11001T          | T10I                 | Delta   | X    | X                | X       | X        | X              | X   | X   | X              | X              |
| ORF1ab | A11201G          | T77A                 | Delta   | X    | X                | X       | X        | X              | X   | X   | X              | X              |
| ORF1ab | G13812T          | M124I                | Delta   | X    | X                | X       | X        | X              | X   | X   | X              | X              |
| ORF1ab | C14408T          | P323L                | Delta   | X    | X                | X       | X        | X              | X   | X   | X              | X              |
| ORF1ab | C15371T          | T644M                | Delta   | X    | X                | X       | X        | X              | X   | X   | X              | X              |
| ORF1ab | G15451A          | G671S                | Delta   | X    | X                | X       | X        | X              | X   | X   | X              | X              |
| ORF1ab | C16466T          | P77L                 | Delta   | X    | X                | X       | X        | X              | X   | X   | X              | X              |
| ORF1ab | A17888G          | E551G                | Delta   | X    | X                | X       | X        | X              | X   | X   | X              | X              |
| ORF1ab | C19220T          | A394V                | Delta   | X    | X                | X       | X        | X              | X   | X   | X              | X              |
| Spike  | C21618G          | T19R                 | Delta   | X    | X                | X       | X        | X              | X   | X   | X              | X              |
| Spike  | G21987A          | G142D                | Delta   | X    | X                | X       | X        | X              | X   | X   | X              | X              |
| Spike  | GAGTTCA22028G    | EFR156-158G deletion | Delta   | X    | X                | X       | X        | X              | X   | X   | X              | X              |
| Spike  | AATT22193A       | NL211-212I deletion  | Omicron | X    | X                | X       | X        | X              | X   | X   | X              | X              |
| Spike  | T22204TGAGCCAGAA | 214EPE insertion     | Omicron | --   | --               | X       | X        | X              | X   | X   | X              | X              |
| Spike  | G22578A          | G339D                | Omicron | X    | X                | X       | X        | X              | X   | X   | X              | X              |
| Spike  | A22582C          | E340D                | Omicron | X    | X                | X       | X        | X              | X   | X   | X              | X              |
| Spike  | T22673C          | S371P                | Omicron | X    | X                | X       | X        | X              | X   | X   | X              | X              |
| Spike  | C22674T          | S371F                | Omicron | X    | X                | X       | X        | X              | X   | X   | X              | X              |
| Spike  | T22679C          | S373P                | Omicron | X    | X                | X       | X        | X              | X   | X   | X              | X              |
| Spike  | C22686T          | S375F                | Omicron | X    | X                | X       | X        | X              | X   | X   | X              | X              |
| Spike  | G22813T          | K417N                | Omicron | X    | X                | X       | X        | X <sup>a</sup> | N   | N   | X <sup>a</sup> | X <sup>a</sup> |
| Spike  | T22882G          | N440K                | Omicron | X    | X                | X       | X        | X <sup>a</sup> | N   | N   | N              | X <sup>a</sup> |
| Spike  | G22898A          | G446S                | Omicron | X    | X                | X       | X        | X <sup>a</sup> | N   | N   | N              | X <sup>a</sup> |
| Spike  | G22992A          | S477N                | Omicron | X    | X                | X       | X        | X              | X   | X   | X              | X              |

|       |                  |                   |         |   |   |   |                |   |                |   |   |   |
|-------|------------------|-------------------|---------|---|---|---|----------------|---|----------------|---|---|---|
| Spike | C22995A          | T478K             | Omicron | X | X | X | X              | X | X              | X | X | X |
| Spike | A23013C          | E484A             | Omicron | X | X | X | X              | X | X              | X | X | X |
| Spike | A23040G          | Q493R             | Omicron | X | X | X | X              | X | X              | X | X | X |
| Spike | G23048A          | G496S             | Omicron | X | X | X | X              | X | X              | X | X | X |
| Spike | A23055G          | Q498R             | Omicron | X | X | X | N              | X | X              | X | X | X |
| Spike | A23063T          | N501Y             | Omicron | X | X | X | N              | X | X              | X | X | X |
| Spike | T23075C          | Y505H             | Omicron | X | X | X | X <sup>a</sup> | X | X              | X | X | X |
| Spike | C23202A          | T547K             | Omicron | X | X | X | X              | X | X              | X | X | X |
| Spike | A23403G          | D614G             | Omicron | X | X | X | X              | X | X              | X | X | X |
| Spike | C23525T          | H655Y             | Omicron | X | X | X | X              | X | X              | X | X | X |
| Spike | T23599G          | N679K             | Omicron | X | X | X | X              | X | X              | X | X | X |
| Spike | C23604A          | P681H             | Omicron | X | X | X | X              | X | X              | X | X | X |
| Spike | C23854A          | N764K             | Omicron | X | X | X | X              | X | X <sup>a</sup> | X | X | X |
| Spike | G23948T          | D796Y             | Omicron | X | X | X | X              | X | X              | X | X | X |
| Spike | C24130A          | N856K             | Omicron | X | X | X | X              | X | X              | X | X | X |
| Spike | A24424T          | Q954H             | Omicron | X | X | X | X              | X | X              | X | X | X |
| Spike | T24469A          | N969K             | Omicron | X | X | X | X              | X | X              | X | X | X |
| Spike | C24503T          | L981F             | Omicron | X | X | X | X              | X | X              | X | X | X |
| ORF3a | T25577C          | I62T              | Omicron | X | X | X | X              | X | X              | X | X | X |
| E     | C26270T          | T9I               | Omicron | X | X | X | X              | X | X              | X | X | X |
| M     | A26530G          | D3G               | Omicron | X | X | X | X              | X | X              | X | X | X |
| M     | C26577G          | Q19E              | Omicron | X | X | X | X              | X | X              | X | X | X |
| M     | G26709A          | A63T              | Omicron | X | X | X | X              | X | X              | X | X | X |
| N     | C28311T          | P13L              | Omicron | X | X | X | X              | X | X              | X | X | X |
| N     | GGAGAACGCA28361G | ERS31-33 deletion | Omicron | X | X | X | X              | X | X              | X | X | X |
| N     | G28881A          | R203K             | Omicron | X | X | X | X              | X | X              | X | X | X |
| N     | G28883C          | G204R             | Omicron | X | X | X | X              | X | X              | X | X | X |

<sup>a</sup>: low sequencing depth (<40%);

AmpliSeq: AmpliSeq Insight sequencing (performed at NY State DOH);

harvest: ARTIC NGS amplicon sequencing using cells and supernatant after 96h virus culture;

shotgun: metagenomics shotgun sequencing (performed at NYU);

N: not covered;

X: mutation is present;

xGen: IDT xGen NGS amplicon sequencing (performed at NYU);

24h-96h: ARTIC NGS amplicon sequencing using supernatants after the indicated culture time points (performed at NY State DOH);

--: no coverage

**Table S2.** Real-time RT-PCR results and infectious virus titers during culture of the SARS-CoV-2 Delta-Omicron recombinant in VeroE6/TMPRSS2 cells, related to **Figure 1**.

| Sample       | Ct value (N1) | Virus titer (log <sub>10</sub> PFU/ml) |
|--------------|---------------|----------------------------------------|
| NPS specimen | 30.76         | ND                                     |
| 24 hpi       | 30.55         | 2.67                                   |
| 48 hpi       | 23.10         | 4.66                                   |
| 72 hpi       | 16.77         | 6.97                                   |
| 96 hpi       | 13.50         | 6.67                                   |

Abbreviations: Ct: cycle threshold value, hpi: hours post infection, ND=not done, NPS: naso-pharyngeal swab, PFU: plaque-forming units.

**Table S3.** cDNA gene synthesis for the generation of the SARS-CoV-2 Delta-Omicron spike plasmid, and primers for the insertion of point mutations into plasmids for pseudotyped virus generation, related to **Figures 3-5**.

| synthesized cDNA gene for Delta-Omicron spike (Delta segment to be fused to BA.1) |                                                                                                                                                                                                                                                                                                                                                                                                                                                                                                                                                                                                                                                                                                                                                                            |
|-----------------------------------------------------------------------------------|----------------------------------------------------------------------------------------------------------------------------------------------------------------------------------------------------------------------------------------------------------------------------------------------------------------------------------------------------------------------------------------------------------------------------------------------------------------------------------------------------------------------------------------------------------------------------------------------------------------------------------------------------------------------------------------------------------------------------------------------------------------------------|
| KpnI site                                                                         | GGTACC                                                                                                                                                                                                                                                                                                                                                                                                                                                                                                                                                                                                                                                                                                                                                                     |
| Kozak                                                                             | gccacc                                                                                                                                                                                                                                                                                                                                                                                                                                                                                                                                                                                                                                                                                                                                                                     |
| gene                                                                              | ATGTTTCGTGTTTCTGGTGCTGCTGCCTCTGGT<br>GTCCAGCCAGTGTGTGAACCTGAGGACCAGA<br>ACACAGCTGCCTCCAGCCTACACCAACAGCTT<br>TACCAGAGGCGTGTACTACCCCGACAAGGTG<br>TTCAGATCCAGCGTGCTGCACTCTACCCAGGA<br>CCTGTTCTGCCTTTCTTCAGCAACGTGACCT<br>GGTTCCACGCCATCCACGTGTCCGGCACCAAT<br>GGCACCAAGAGATTCGACAACCCCGTGCTGC<br>CCTTCAACGACGGGGTGTACTTTGCCAGCACC<br>GAGAAGTCCAACATCATCAGAGGCTGGATCTT<br>CGGCACCACACTGGACAGCAAGACCCAGAGC<br>CTGCTGATCGTGAACAACGCCACCAACGTGGT<br>CATCAAAGTGTGCGAGTTCCAGTTCTGCAACG<br>ACCCCTTCTGGACGTCTACTACCACAAGAAC<br>AACAAGAGCTGGATGGAAAGCGGGGTGTACA<br>GCAGCGCCAACAACACTGCACCTTCGAGTACGT<br>GTCCCAGCCTTTCCTGATGGACCTGGAAGGCA<br>AGCAGGGCAACTTCAAGAACCTGCGCGAGTT<br>CGTGTTCAAGAACATCGACGGCTACTTCAAGA<br>TCTACAGCAAGCACACCCCTATCATCGTGCGG<br>GATCTGCCTCAGGGCTTCTCTGCTCTGGAACC |

|              |                                                                                                                                                                                                                                                                                                                                                                                                                                    |
|--------------|------------------------------------------------------------------------------------------------------------------------------------------------------------------------------------------------------------------------------------------------------------------------------------------------------------------------------------------------------------------------------------------------------------------------------------|
|              | CCTGGTGGATCTGCCATCGGCATCAACATCA<br>CCCGGTTTCAGACACTGCTGGCCCTGCACAG<br>AAGCTACCTGACACCTGGCGATAGCAGCAGC<br>GGATGGACAGCTGGTGCCGCCGCTTACTATG<br>TGGGCTACCTGCAGCCTAGAACCTTCCTGCTG<br>AAGTACAACGAGAACGGCACCATCACCGACG<br>CCGTGGATTGTGCTCTGGATCCTCTGAGCGAG<br>ACAAAGTGCACCCTGAAGTCCTTCACCGTGGA<br>AAAGGGCATCTACCAGACCAGCAACTTCCGG<br>GTGCAGCCCACCGAATCCATCGTGCCGGTTCC<br>CCAATATACCAATCTGTGCCCTTCGACGAC<br>GTCTTTAACGCAACACGGTTCGCCTCAGTG |
| XhoI site    | CTCGAG                                                                                                                                                                                                                                                                                                                                                                                                                             |
| Primer       |                                                                                                                                                                                                                                                                                                                                                                                                                                    |
| DO-Fusion-F  | CACCAATCTGTGCCCTTCGACGACGTCTTTA<br>ACGCAACACGGTTCGCCTCAGTG                                                                                                                                                                                                                                                                                                                                                                         |
| DO-Fusion-R  | CACTGAGGCGAACCGTGTTGCGTTAAAGACGT<br>CGTCGAAGGGGCACAGATTGGTG                                                                                                                                                                                                                                                                                                                                                                        |
| E340D-F      | CACCAATCTGTGCCCTTCGGCGACGTGTTCA<br>ATGCCACCAGATTC                                                                                                                                                                                                                                                                                                                                                                                  |
| E340D-R      | GAATCTGGTGGCATTGAACACGTCGCCGAAG<br>GGGCACAGATTGGTG                                                                                                                                                                                                                                                                                                                                                                                 |
| E340K-F      | CACCAATCTGTGCCCTTCGGCAAGGTGTTCA<br>ATGCCACCAGATTC                                                                                                                                                                                                                                                                                                                                                                                  |
| E340K-R      | GAATCTGGTGGCATTGAACACCTTGCCGAAGG<br>GGCACAGATTGGTG                                                                                                                                                                                                                                                                                                                                                                                 |
| E340A-F      | CACCAATCTGTGCCCTTCGGCGCGGTGTTCA<br>ATGCCACCAGATTC                                                                                                                                                                                                                                                                                                                                                                                  |
| E340A-R      | GAATCTGGTGGCATTGAACACCGCGCCGAAG<br>GGGCACAGATTGGTG                                                                                                                                                                                                                                                                                                                                                                                 |
| E340V-F      | CACCAATCTGTGCCCTTCGGCGTGGTGTTC<br>ATGCCACCAGATTC                                                                                                                                                                                                                                                                                                                                                                                   |
| E340V-R      | GAATCTGGTGGCATTGAACACCACGCCGAAG<br>GGGCACAGATTGGTG                                                                                                                                                                                                                                                                                                                                                                                 |
| P337L-F      | GGTCCCAATATACCAATCTGTGCCTCTTC<br>GGCGAGGTGTTCAATGCCACCAG                                                                                                                                                                                                                                                                                                                                                                           |
| P337L-R      | CTGGTGGCATTGAACACCTCGCCGAAGAGGC<br>ACAGATTGGTGATATTGGGGAACC                                                                                                                                                                                                                                                                                                                                                                        |
| BA.1-E340D-F | CATCACTAATTTGTGCCCTTCGACGA <sub>c</sub> GTCTT<br>TAACGCAACACGGTTCGCC                                                                                                                                                                                                                                                                                                                                                               |
| BA.1-E340D-R | GGCGAACCGTGTTGCGTTAAAGAC <sub>g</sub> TCGTCTGA<br>AGGGGCACAAATTAGTGATG                                                                                                                                                                                                                                                                                                                                                             |
| DO-D340E-F   | TCACCAATCTGTGCCCTTCGACGA <sub>a</sub> GTCTTTA<br>ACGCAACACGGTTCGCC                                                                                                                                                                                                                                                                                                                                                                 |
| DO-D340E-R   | GGCGAACCGTGTTGCGTTAAAGAC <sub>i</sub> TCGTCTGA<br>AGGGGCACAGATTGGTGA                                                                                                                                                                                                                                                                                                                                                               |



**Table S4.** IC50 of BNT162b2-elicited antibodies against viruses with variant spike proteins in sera collected from COVID-19-unexperienced and experienced donors, related to **Figure 5.**

| <b>BNT162b2, COVID-19-Unexperienced</b> |        |     |                                  |                    |                      |                    |                      |                    |                      |                    |                      |                    |                      |
|-----------------------------------------|--------|-----|----------------------------------|--------------------|----------------------|--------------------|----------------------|--------------------|----------------------|--------------------|----------------------|--------------------|----------------------|
|                                         |        |     |                                  | D614G              |                      | Delta              |                      | Omicron BA.1       |                      | Omicron BA.2       |                      | Delta-Omicron      |                      |
| Donor                                   | Age    | Sex | Comorbidities                    | 1 month post vax-2 | 1 month post booster | 1 month post vax-2 | 1 month post booster | 1 month post vax-2 | 1 month post booster | 1 month post vax-2 | 1 month post booster | 1 month post vax-2 | 1 month post booster |
| 1                                       | 34     | M   | None                             | 1250               | 4106                 | 105                | 371                  | 37.84              | 1027                 | 15.27              | 326.5                | 24.54              | 621.9                |
| 2                                       | 29     | F   | None                             | 572                | 3206                 | 156.2              | 1851                 | 14.11              | 824.8                | 4.605              | 238.9                | 21.51              | 363.7                |
| 3                                       | 37     | F   | Allergy                          | 946                | 6359                 | 386                | 3234                 | 58.34              | 677.5                | 70.71              | 319.1                | 76.41              | 372.2                |
| 4                                       | 62     | M   | Hypertension, Hyperlipidemia     | 671.2              | 3789                 | 1032               | 4024                 | 85                 | 1154                 | ND                 | 428.8                | 39.5               | 681                  |
| 5                                       | 52     | F   | Hypertesion                      | 581.1              | 3275                 | 265.4              | 7040                 | 66.11              | 2221                 | 149.1              | 141                  | 58.47              | 33.25                |
| 6                                       | 34     | M   | Hypothyroidism                   | 966.2              | 6301                 | 433.1              | 6319                 | ND                 | 527                  | 100.6              | 54.87                | 105.7              | 74.84                |
| 7                                       | 38     | F   | Asthma, Anemia, Tinea versicolor | 1060               | 5541                 | 444.8              | 4045                 | 2.097              | 1315                 | ND                 | 724.6                | ND                 | 715.2                |
| 8                                       | 38     | M   | None                             | 423.3              | 1882                 | 373.2              | 8163                 | 38.33              | 678.7                | 27.7               | 231.6                | 38.27              | 324.4                |
| 9                                       | 52     | F   | None                             | 484.8              | 6286                 | 514.4              | 12903                | 92.72              | 709.6                | 46.95              | 266                  | 62.37              | 538                  |
| Mean (SD)                               | 41 (9) |     |                                  | 772                | 4527                 | 412                | 5327                 | 44                 | 1014                 | 46                 | 303                  | 47                 | 413                  |

| <b>BNT162b2, COVID-19-Experienced</b> |     |     |               |                    |                      |                    |                      |                    |                      |                    |                      |                    |                      |
|---------------------------------------|-----|-----|---------------|--------------------|----------------------|--------------------|----------------------|--------------------|----------------------|--------------------|----------------------|--------------------|----------------------|
|                                       |     |     |               | D614G              |                      | Delta              |                      | Omicron BA.1       |                      | Omicron BA.2       |                      | Delta-Omicron      |                      |
| Donor                                 | Age | Sex | Comorbidities | 1 month post vax-2 | 1 month post booster | 1 month post vax-2 | 1 month post booster | 1 month post vax-2 | 1 month post booster | 1 month post vax-2 | 1 month post booster | 1 month post vax-2 | 1 month post booster |
| 1                                     | 45  | M   | Asthma        | 5958               | 10443                | 5883               | 11917                | 169                | 1695                 | 134.7              | 1456                 | 337.7              | 1138                 |
| 2                                     | 37  | F   | None          | 8016               | 8991                 | 5506               | 8828                 | 208                | 1389                 | 309.9              | 516.5                | 512.6              | 883.6                |

|           |        |   |                             |       |       |      |       |       |       |       |       |       |       |
|-----------|--------|---|-----------------------------|-------|-------|------|-------|-------|-------|-------|-------|-------|-------|
| 3         | 54     | F | Hypertension,<br>Obesity    | 11024 | 10453 | 2128 | 7968  | 174.3 | 1012  | 349.5 | 729   | 208.9 | 512.9 |
| 4         | 54     | M | Cardiovascular<br>disease   | 3989  | 7811  | 1406 | 8946  | 223.5 | 1566  | 79.65 | 1455  | 130.5 | 530.1 |
| 5         | 25     | F | None                        | 7768  | 10831 | 2073 | 8626  | 109.2 | 329.1 | 234.3 | 690.9 | 110   | 438.6 |
| 6         | 42     | F | Diabetes, Herpes<br>simplex | 10747 | 9331  | 3240 | 17502 | 345.1 | 1364  | 180.5 | 712.2 | 256   | 235.1 |
| 7         | 43     | M | None                        | 5974  | 13891 | 2064 | 15888 | 171.7 | 334.3 | 211.7 | 346.1 | 275.8 | 353.1 |
| Mean (SD) | 41 (9) |   |                             | 7639  | 10250 | 3185 | 11382 | 200   | 1098  | 214   | 843   | 261   | 584   |
